# Supplementary material for: Possibility of regulating valley-contrasting physics and topological properties by ferroelectricity in functionalized arsenene
Source: Royal Society of Chemistry journal article supplement (doi:10.1039/d2cp03196e), 2022-01-01
Supplement: d2cp03196e1.pdf [file d2cp03196e1.pdf]

## Supplementary Information

### **Possibility of regulating valley-contrasting physics and nontrivial topology by ferroelectricity in functionalized arsenene**

Xiaohan Ren,<sup>a</sup> Yaping Wang,<sup>b</sup> Weixiao Ji,<sup>a</sup> Miaojuan Ren,<sup>a</sup> Peiji Wang,<sup>a</sup> Shufeng Zhang,<sup>a</sup> Shengshi Li<sup>a,\*</sup> and  
Changwen Zhang<sup>a,\*</sup>

<sup>a</sup> *Spintronics Institute, School of Physics and Technology, University of Jinan, Jinan, 250022, China*

<sup>b</sup> *State Key Lab of Crystal Materials and Institute of Crystal Materials, Shandong University, Jinan 250100, China*

#### **Corresponding Author:**

\*E-mail: sdy\_liss@ujn.edu.cn

\*E-mail: ss\_zhangchw@ujn.edu.cn

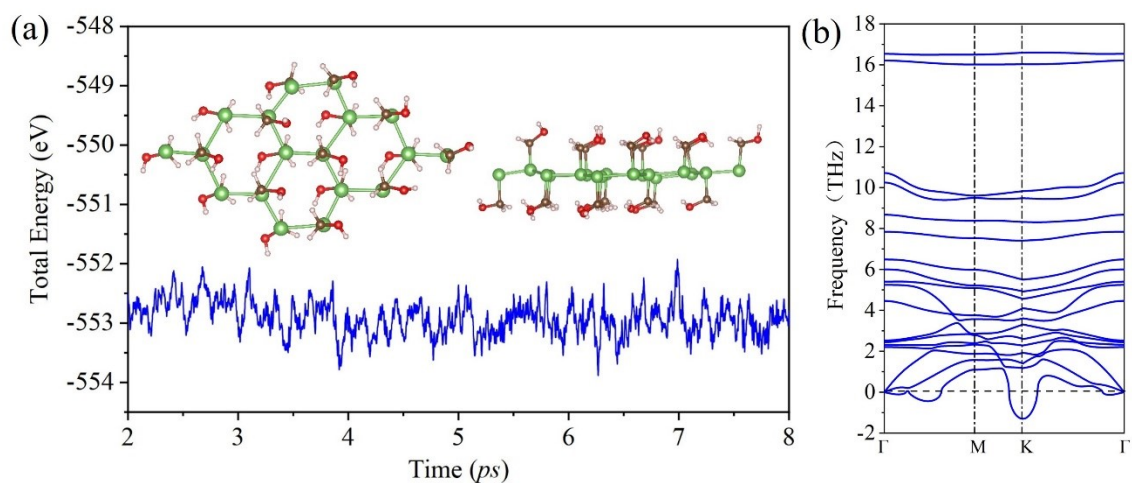

**Fig. S1** (a) Evolution of the total energy for the monolayer A-AsCH<sub>2</sub>OH obtained from the AIMD simulation at 237K. The inset is the final structure of the monolayer A-AsCH<sub>2</sub>OH. (b) Calculated phonon spectrum of the monolayer A-AsCH<sub>2</sub>OH.

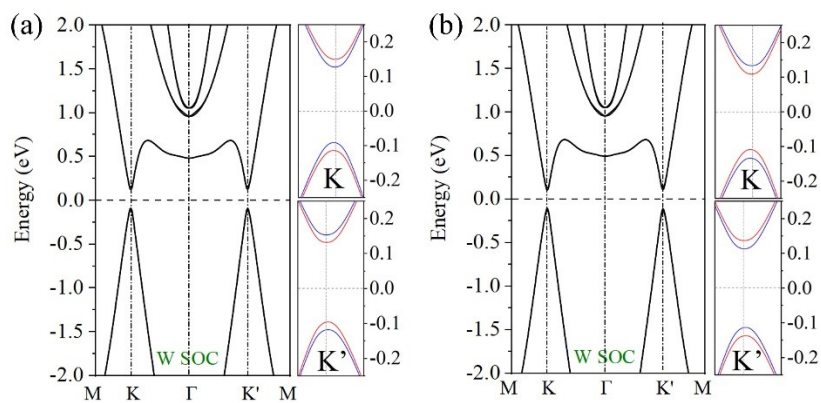

**Fig. S2** Calculated band structure based on HSE06 functional for monolayers A-AsCH<sub>2</sub>OH (a) and A'-AsCH<sub>2</sub>OH (b).

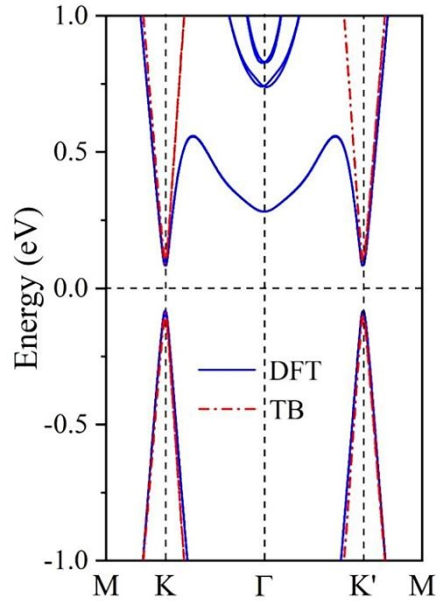

**Fig. S3** Band structure of the monolayer A-AsCH<sub>2</sub>OH obtained from DFT calculation and TB fitting.

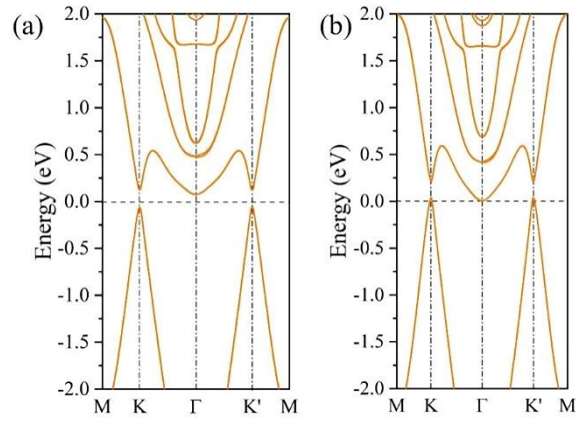

**Fig. S4** Band structure of the monolayer A-AsCH<sub>2</sub>OH with 3% (a) and 4% (b) compressive strain.

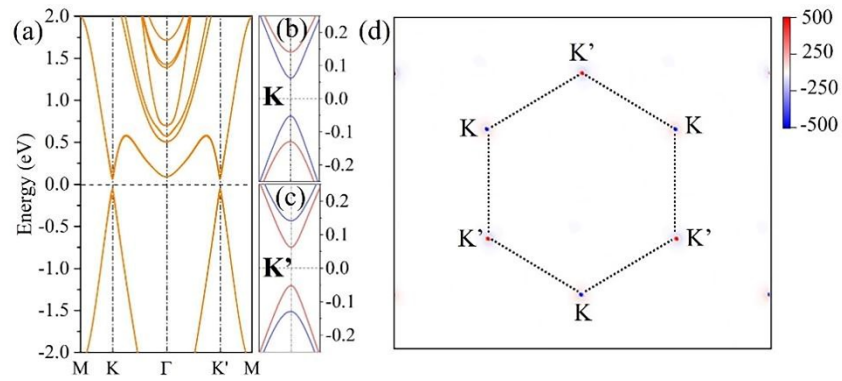

**Fig. S5** (a) Calculated SOC band structures of the monolayer AsCH<sub>2</sub>OH with a 180° rotation. (b-c) The enlarged views of energy bands at K and K' valleys, respectively. The red and blue lines separately represent spin-up and spin-down states. (d) Calculated Berry curvatures in the Brillouin zone.

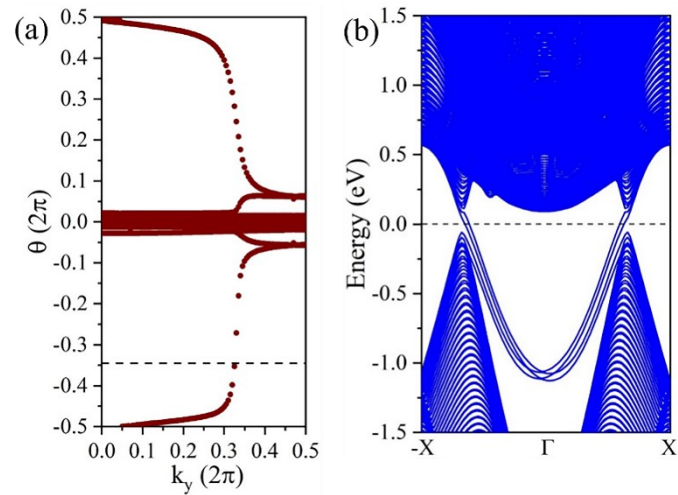

**Fig. S6** Evolution of Wannier charge center and edge states for the monolayer AsCH<sub>2</sub>OH with a 180° rotation.
